# Supplementary material for: Critical Evaluation of a microRNA-Based Risk Classifier Predicting Cancer-Specific Survival in Renal Cell Carcinoma with Tumor Thrombus of the Inferior Vena Cava
Source: MDPI journal article supplement (doi:10.3390/cancers15071981), 2023-03-26
Supplement: s1 [file s1]

## Supplementary Materials

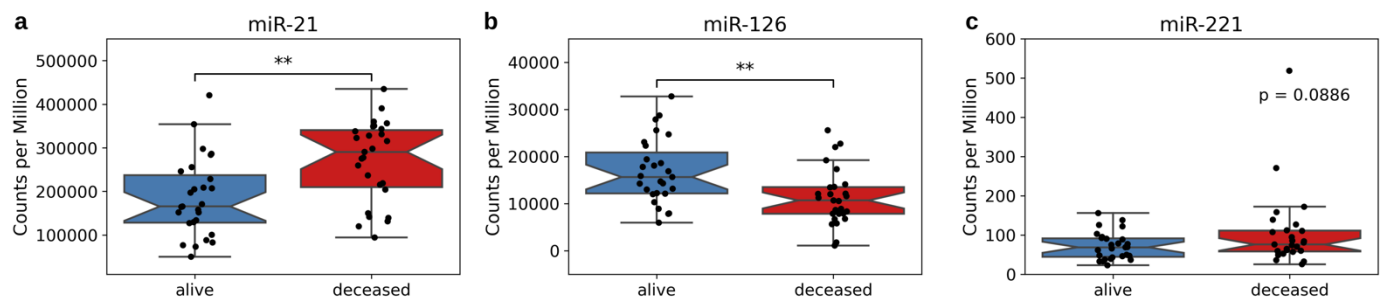

**Figure S1.** miR-21 (a), miR-126 (b) and miR-221 (c) expression levels depending on overall survival status in pT3b ccRCC samples ( $n = 54$ ) of The Cancer Genome Atlas (TCGA) database. Significant changes between subgroups were calculated using unpaired Student's t test (miR-21, miR-126) or Mann-Whitney-U test (miR-221).  $p < 0.01$   $**$ .

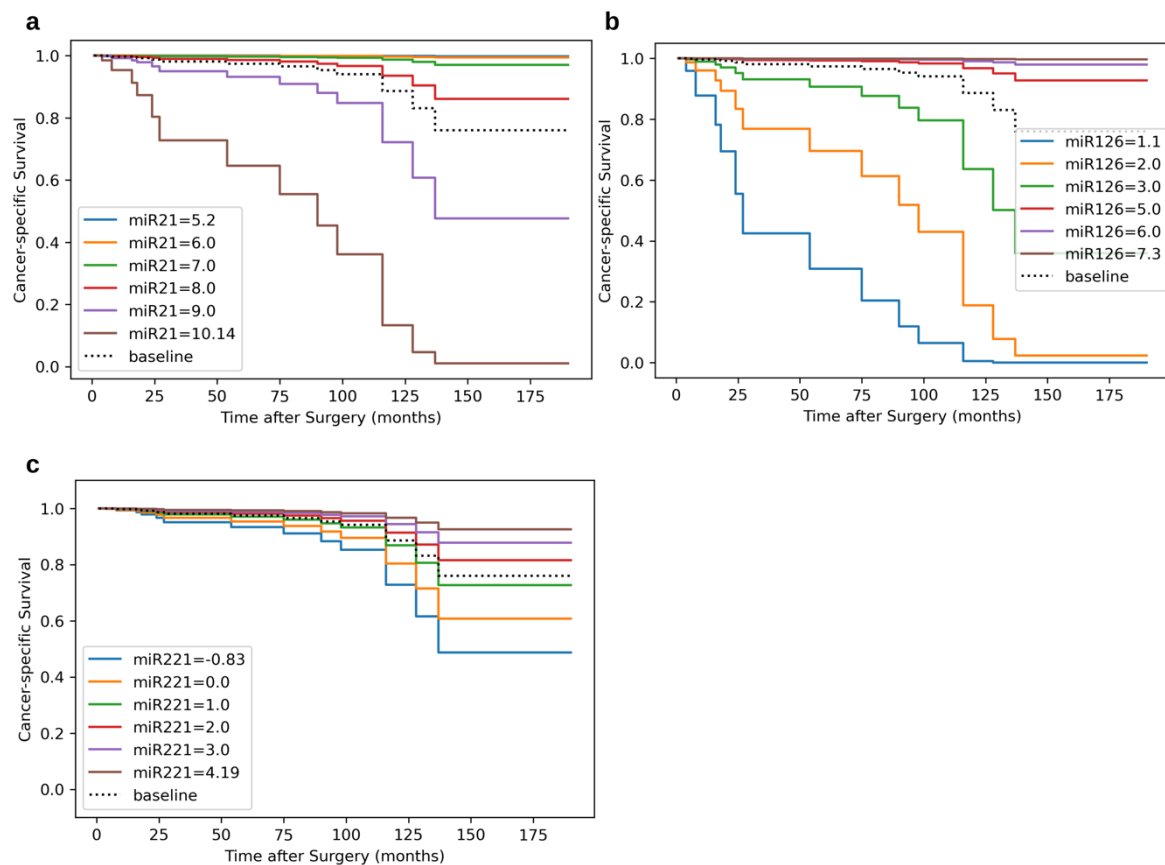

**Figure S2.** Survival curves for varying miR expression levels of miR-21 (a), miR-126 (b) and miR-221 (c) – based on fitted multivariable Cox regression model – illustrating partial correlations of single miRNAs on cancer-specific survival for present study cohort ( $n = 54$ ). The baseline represents median relative expression for each miRNA (miR-21 = 8.34  $\Delta$ Ct, miR-126 = 4.0  $\Delta$ Ct, miR-221 = 1.3  $\Delta$ Ct). Blue line represents minimum and brown line the maximum relative expression of each miRNA.

**Table S1.** Summary of partial AIC (Akaike information criterion) values for different multivariable Cox model combinations.

| Cox Model Combination                                 | Partial AIC |
|-------------------------------------------------------|-------------|
| miR-21, miR-126, miR-221                              | 60.67       |
| miR-21, miR-126                                       | 61.14       |
| miR-21, miR-126, Fuhrman Grade                        | 61.16       |
| miR-21, miR-126, Tumor Size                           | 61.67       |
| miR-21, miR-126, miR-221, Fuhrman Grade, Nodal Status | 62.0        |
| miR-21, miR-126, Nodal Status                         | 62.76       |

**Table S2.** Sensitivities, specificities and associated *p* values for the combined risk classifier with differing cut-off levels.

| Cut-off [ $\Delta$ Ct] | Sensitivity [%] | Specificity [%] | <i>p</i> value        |
|------------------------|-----------------|-----------------|-----------------------|
| 16.0                   | 100             | 42              | 0.001009              |
| 17.0                   | 100             | 51              | 0.000158              |
| 18.0                   | 92              | 61              | 0.000075              |
| 18.7                   | 92              | 61              | 0.000075              |
| 19.0                   | 92              | 63              | 0.000053              |
| 20.0                   | 85              | 71              | 0.000078              |
| 21.0                   | 85              | 78              | 0.000005              |
| 22.0                   | 85              | 85              | $2.29 \times 10^{-7}$ |
| 23.0                   | 85              | 88              | $6.93 \times 10^{-9}$ |
| 24.0                   | 85              | 88              | $6.93 \times 10^{-9}$ |
| 25.0                   | 62              | 90              | $3.75 \times 10^{-8}$ |

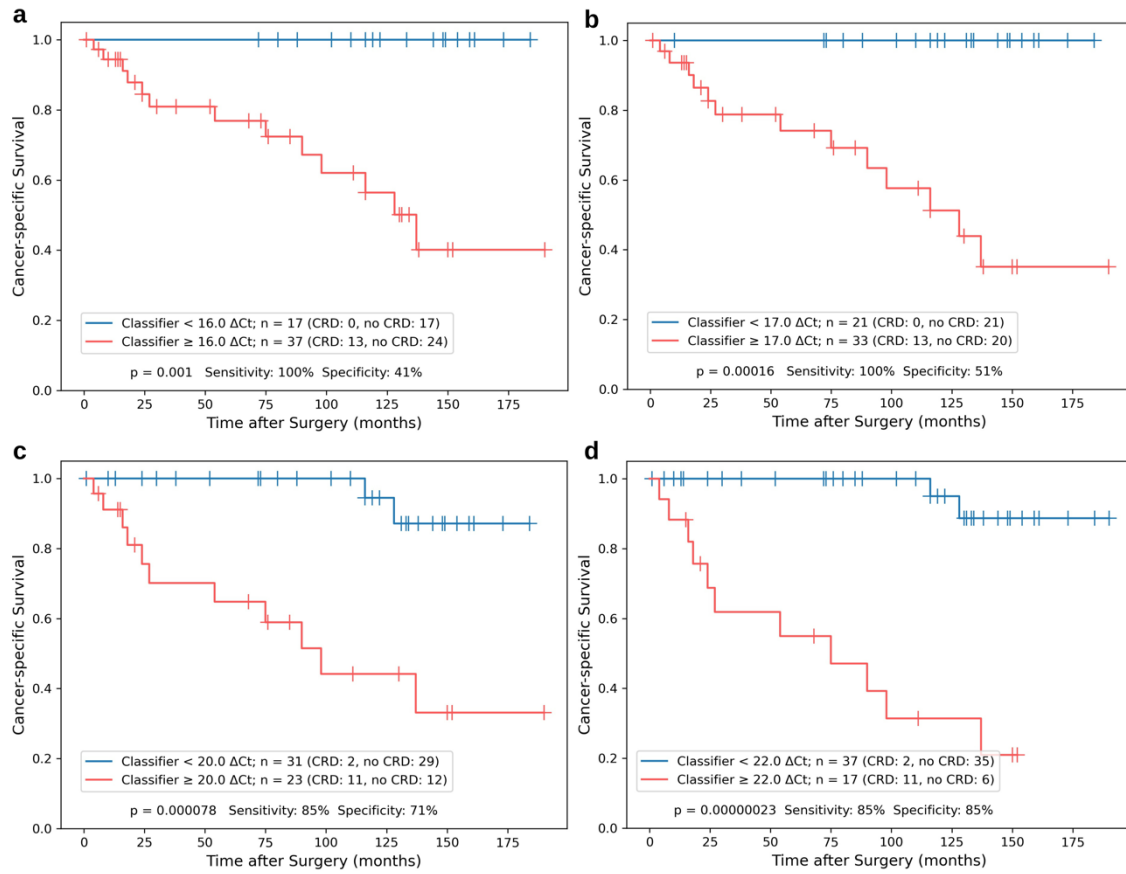

**Figure S3.** (a-d) Kaplan Meier survival analysis for CSS for external independent ccRCC<sup>IVC</sup> ( $n = 54$ ) cohort from Regensburg stratified by Combined miR-based risk classifier (miR-21, -126, -221) using various cut-off values.  $p$  values from log-rank tests are shown within each plot.
